# Supplementary material for: Downregulation of mitochondrial biogenesis by virus infection triggers antiviral responses by cyclic GMP-AMP synthase
Source: PubMed Central journal article supplement (PMC8516216; doi:10.1371/journal.ppat.1009841), 2021-10-14
Supplement: ppat.1009841.s007.pdf [file ppat.1009841.s007.pdf]

S1 Table: List of antibodies, siRNAs and primer pairs used in this study

Antibodies

| antibody                                         | maker                          | cat. No       |
|--------------------------------------------------|--------------------------------|---------------|
| anti-COX IV mouse monoclonal antibody            | abcam                          | ab33985       |
| anti-VSV NewJersey Glycoprotein rabbit antiserum | Alpha Diagnostic International | VSNG13-S      |
| anti-Sendai virus rabbit antiserum               | MBL                            | PD029         |
| anti-RSV nucleoprotein mouse monoclonal antibody | abcam                          | ab94806       |
| anti-vaccinia virus rabbit polyclonal antibody   | abcam                          | ab35219       |
| anti-HA-tag mouse monoclonal antibody            | SIGMA-ALDRICH                  | H90658        |
| anti-HSP70 mouse monoclonal antibody             | Enzo                           | ADI-SPA-810-D |
| anti-GAPDH mouse monoclonal antibody             | Millipore                      | MAB374        |
| anti-PDI rabbit polyclonal antibody              | Stressgen                      | SPA-890       |
| anti-histone H3 rabbit polyclonal antibody       | Biovision                      | 3624-100      |
| anti-PGC1alpha rabbit polyclonal antibody        | abcam                          | ab54481       |
| anti-MAVS rabbit polyclonal antibody             | abcam                          | ab31334       |
| anti-STING mouse monoclonal antibody             | Proteintech                    | 66680-1-Ig    |
| anti-p-STING (S366) rabbit monoclonal antibody   | Cell signaling technology      | D7C3S         |
| mouse IgG Isotype                                | R&D                            | 11711         |
| Alexa488 donkey anti-mouse IgG                   | Invitrogen                     | A21202        |
| Alexa488 goat anti-rabbit IgG                    | Invitrogen                     | A11008        |
| Alexa568 goat anti-mouse IgG                     | Invitrogen                     | A11019        |
| Alexa405 goat anti-rabbit IgG                    | Abcam                          | ab175651      |

siRNA

|                | Official symbol | Accession ID | sense                     | antisensed                | Official full name                        | homology             |
|----------------|-----------------|--------------|---------------------------|---------------------------|-------------------------------------------|----------------------|
| <u>human</u>   |                 |              |                           |                           |                                           |                      |
| cGAS           | CGAS            | NM_138441    | GCACGUGAAGAUUUCUGCACCUAAU | AUUAGGUGCAGAAAUCUUCACGUGC | cyclic GMP-AMP synthase                   |                      |
| MAVS           | MAVS            | NM_020746    | CCGUUUGCUGAAGACAAGACCUAUA | UAUAGGUCUUGUCUUCAGCAAACGG | mitochondrial antiviral signaling protein |                      |
| PGC-1 $\alpha$ | PPARGC1A        | NM_001330751 | GAACGACUUGGAUACAGACAGCUUU | AAAGCUGUCUGUAUCCAAGUCGUUC | PPARG coactivator 1 alpha                 |                      |
| Mfn1           | MFN1            | NM_033540    | CAGAGCUGGAUAGCUGGAUUGAUAA | UUAUCAAUCCAGCUAUCCAGCUCUG | mitofusin 1                               | african green monkey |

S1 Table (continued)

| qPCR primer pairs |                    |                    | Forward primer           | Reverse primer           | Official full name                                                              | homology                         |
|-------------------|--------------------|--------------------|--------------------------|--------------------------|---------------------------------------------------------------------------------|----------------------------------|
|                   | Official symbol ID | Official symbol ID |                          |                          |                                                                                 |                                  |
| <b>human</b>      |                    |                    |                          |                          |                                                                                 |                                  |
| 28S rRNA          | RNA28SN1           | NR_145822.1        | CGACGTCGCTTTTTGATCC      | GCAACAACACATCATCAGTAG    | 28S ribosomal N1, ribosomal RNA                                                 | mouse, african green monkey, dog |
| IFN-β             | IFNB1              | NM_002176          | ATGACCAACAAGTGTCTCCTC    | GCCACAGGAGCTTCTGACAC     | interferon beta 1                                                               |                                  |
| cxcl10            | CXCL10             | NM_001565.3        | CCTGCAAGCCAATTTTGTCC     | GATGGCCTTCGATTCTGGAT     | C-X-C motif chemokine ligand 10                                                 |                                  |
| Ifi44             | IFI44              | NM_006417.4        | AGGTCTGTTTTCCAAGGGCA     | TTGCCATCTTTCCCGTCTCT     | interferon induced protein 44                                                   |                                  |
| Ifit2             | IFIT2              | NM_001547.4        | TGAAAGAGCGAAGGTGTGCT     | AGAGGGTCAATGGGTTCTG      | interferon induced protein with tetratricopeptide repeats 2                     |                                  |
| Mx2               | MX2                | NM_002463.1        | TGAACGTGCAGCGAGCTT       | TGGTGTTCACCATCTCGTCCG    | MX dynamin like GTPase 2                                                        |                                  |
| OAS1              | OAS1               | NM_016816.3        | GGTGGAGTTCGATGTGCTG      | AGGTTTATAGCCGCCAGTCA     | 2'-5'-oligoadenylate synthetase 1                                               |                                  |
| OAS2              | OAS2               | NM_016817.2        | CCAGCTGAGAGCAATGGGAA     | TGGTGTTCACCATCTCGTCCG    | 2'-5'-oligoadenylate synthetase 2                                               |                                  |
| STAT1             | STAT1              | NM_007315.3        | CATTCCGTGGACGAGTTTT      | GATGCACCCATCATTCCAGA     | signal transducer and activator of transcription 1                              |                                  |
| IFN-α             | IFNA1              | NM_024013.2        | GATGCTCCTGGCACAATGA      | CTGGAAGTGGTTCATCAA       | interferon alpha 1                                                              |                                  |
| H2AFL             | HIST1H2AC          | NM_003512.3        | ATGTCTGGACGTGTAAGC       | GTAGTTGCCTTTACGGAGC      | histone cluster 1 H2A family member c                                           |                                  |
| JAK1              | JAK1               | NM_002227.3        | AGAGGACTGCAATGCCATGG     | CCGACAGATAGAAGATCAC      | Janus kinase 1                                                                  |                                  |
| LAMA4             | LAMA4              | NM_001105206.2     | ATGGCTTTGAGCTCAGCCTG     | TGAGCTCCCTTCAATGTC       | laminin subunit alpha 4                                                         |                                  |
| ATP1A1            | ATP1A1             | NM_000701.7        | AATTCGGTCTTCCAGCAGGG     | GTAGGGGAAGGCACAGAACC     | ATPase Na <sup>+</sup> /K <sup>+</sup> transporting subunit alpha 1             |                                  |
| SLC27A4           | SLC27A4            | NM_005094.3        | GTCTCCTGAAGGTGAAGGC      | CCTGCAGGAAGTTGGCTAC      | solute carrier family 27 member 4                                               |                                  |
| MAPK6             | MAPK6              | NM_002748          | ATTCATGGTTTTGATCTGGG     | GCTACTCTTTTGTACAGTC      | mitogen-activated protein kinase 6                                              |                                  |
| ATP5G3            | ATP5G3             | NM_001689          | ATGTTCCGCTGCGCCAAG       | CTCTCCAGTCTACTAGC        | ATP synthase, H <sup>+</sup> transporting, mitochondrial Fo complex, subunit C3 |                                  |
| MDH1              | MDH1               | NM_005917.3        | TCCTGGACGGTGCCTAATGG     | GCAACGCTTCTTTATCTGTTGCG  | malate dehydrogenase 1                                                          |                                  |
| MRPL43            | MRPL43             | NM_032112.2        | GACTTCGCCCGACGGAATC      | GTATTCGGCCACTACTCTGGG    | mitochondrial ribosomal protein L43                                             |                                  |
| NDUF8             | NDUF8              | NM_014222.2        | CCCAACAAGGAGTTTATGCTCT   | CACAGTGACGTTTTATCTGCCT   | NADH:ubiquinone oxidoreductase subunit A8                                       |                                  |
| NDUFB4            | NDUFB4             | NM_004547          | ATGTGCTTCCCAAAGTATAAGCCG | TCTTATGGCCAACCGCTC       | NADH dehydrogenase (ubiquinone) 1 beta subcomplex, 4                            |                                  |
| ITGAM             | ITGAM              | NM_000632.3        | AGGACTTGCCAGACCAC        | GTCTGGGATACTTCTCGTGT     | integrin subunit alpha M                                                        |                                  |
| PGC-1alpha        | PPARGC1A           | NM_001330751.2     | TGAAGGGTACTTTTCTGCCTC    | GCACAACTGGATTCCGCCAG     | PPARG coactivator 1 alpha                                                       |                                  |
| TFAM              | TFAM               | NM_003201.3        | CCAAAAAGACCTCGTTCAGCTT   | CTTCAGCTTTTCTGCGGTG      | transcription factor A, mitochondrial                                           |                                  |
| mtDNA D-loop      |                    | MH980012           | GACCACCATCCTCCGTGAAATC   | TCACTTTAGCTACCCCAAGTGTTA | (amplicon location : 16397-16485 in 16568)                                      |                                  |
| mtDNA 1           |                    |                    | CTATCACCCCTATTAACCACTCA  | TTGCGCTGTAATATTGAACGTA   | (11-189)                                                                        |                                  |
| mtDNA 2           |                    |                    | CACCCAAGAACAGGGTTTGT     | TGGCCATGGGTATGTTGTTAA    | (3211-3319)                                                                     |                                  |
| mtDNA 3           |                    |                    | AATCGAGTAGTACTCCCCGATTG  | TTCTAGGACGATGGGCATGAAA   | (8002-8220)                                                                     |                                  |
| mtDNA 4           |                    |                    | AATCCAAGCCTACGTTTTCA     | AGTATGAGGAGCGTTATGGAGT   | (9149-9339)                                                                     |                                  |
| <b>mouse</b>      |                    |                    |                          |                          |                                                                                 |                                  |
| mIFN-b            | Ifnb1              | NM_010510.1        | CTGGAGCAGCTGAATGGAAA     | ATCTCTGGATGGCAAAGGC      | interferon beta 1                                                               |                                  |
| mIfit1            | Ifit1              | NM_008331.3        | CAGCAGCACATCTTGCCAAA     | GAGGAAGGTGATGCCTGCAA     | interferon-induced protein with tetratricopeptide repeats 1                     |                                  |
| mIfit2            | Ifit2              | NM_008332.3        | AGATGAGACTTAGAGGTGCTGC   | TGTGTCAAAGCGCTCAAAGC     | interferon-induced protein with tetratricopeptide repeats 2                     |                                  |
| mIfit3            | Ifit3              | NM_010501.2        | TGCTTTGGGAAAGCTCCTA      | TGTGGATCGCAGTGCTTTTC     | interferon-induced protein with tetratricopeptide repeats 3                     |                                  |
| mIFN-a1           | Ifna1              | NM_010502.2        | GATGCCCAGCAGATCAAGAA     | TGGTGGAGGTCATTGCAGAA     | interferon alpha 1                                                              |                                  |
| mISG15            | Isg15              | NM_015783.3        | TAAAGGTGAAGATGCTGGGG     | CACACCAATCTCTGGGCCAA     | ISG15 ubiquitin-like modifier                                                   |                                  |
| mMx2              | Mx2                | NM_013606          | GTGCGCTATTCCAGGCTC       | AACCCTGGCAATTCTCGTCC     | MX dynamin-like GTPase 2                                                        |                                  |
| mOAS2             | Oas2               | NM_145227.3        | GCTGGTGTGGCATCTTCTA      | GGGGTCTGCATTACTGGCAC     | 2'-5' oligoadenylate synthetase 2                                               |                                  |
| mSTAT1            | Stat1              | NM_009283.4        | ATGGAAGAATCCACCAACGG     | CTGGCACAACTGGGTTTCAA     | signal transducer and activator of transcription 1                              |                                  |
