# Supplementary material for: Downregulation of mitochondrial biogenesis by virus infection triggers antiviral responses by cyclic GMP-AMP synthase
Source: PubMed Central journal article supplement (PMC8516216; doi:10.1371/journal.ppat.1009841), 2021-10-14
Supplement: ppat.1009841.s008.pdf [file ppat.1009841.s008.pdf]

S2 Table: Entire lists of the results of gene ontology analysis

| MeV                                                    | reference | Fold |          |            |     |          |
|--------------------------------------------------------|-----------|------|----------|------------|-----|----------|
|                                                        | genes #   | #    | expected | Enrichment | +/- | P value  |
| GO cellular component complete                         |           |      |          |            |     |          |
| endoplasmic reticulum chaperone complex                | 11        | 5    | 0.23     | 22.09      | +   | 5.67E-03 |
| ↳endoplasmic reticulum part                            | 1340      | 70   | 27.57    | 2.54       | +   | 1.42E-09 |
| ↳cytoplasmic part                                      | 9646      | 324  | 198.49   | 1.63       | +   | 1.82E-31 |
| ↳intracellular part                                    | 14422     | 397  | 296.77   | 1.34       | +   | 5.31E-28 |
| ↳intracellular                                         | 14699     | 398  | 302.47   | 1.32       | +   | 4.59E-26 |
| ↳cell part                                             | 17007     | 416  | 349.97   | 1.19       | +   | 5.08E-18 |
| ↳cell                                                  | 17034     | 416  | 350.52   | 1.19       | +   | 8.77E-18 |
| ↳cytoplasm                                             | 11495     | 360  | 236.54   | 1.52       | +   | 5.06E-33 |
| ↳intracellular organelle part                          | 9183      | 315  | 188.97   | 1.67       | +   | 1.83E-31 |
| ↳intracellular organelle                               | 12625     | 363  | 259.8    | 1.4        | +   | 6.61E-24 |
| ↳organelle                                             | 13455     | 385  | 276.88   | 1.39       | +   | 3.21E-29 |
| ↳organelle part                                        | 9480      | 316  | 195.08   | 1.62       | +   | 6.46E-29 |
| ↳endoplasmic reticulum                                 | 1888      | 89   | 38.85    | 2.29       | +   | 2.09E-10 |
| ↳intracellular membrane-bounded organelle              | 10846     | 331  | 223.19   | 1.48       | +   | 1.87E-23 |
| ↳membrane-bounded organelle                            | 12364     | 374  | 254.43   | 1.47       | +   | 6.44E-33 |
| ↳endomembrane system                                   | 4432      | 168  | 91.2     | 1.84       | +   | 4.95E-14 |
| ↳protein-containing complex                            | 5383      | 200  | 110.77   | 1.81       | +   | 2.76E-17 |
| mitochondrial proton-transporting ATP synthase complex | 23        | 6    | 0.47     | 12.68      | +   | 1.43E-02 |
| ↳inner mitochondrial membrane protein complex          | 147       | 16   | 3.02     | 5.29       | +   | 1.62E-04 |
| ↳mitochondrial inner membrane                          | 443       | 30   | 9.12     | 3.29       | +   | 3.09E-05 |
| ↳mitochondrial membrane                                | 674       | 40   | 13.87    | 2.88       | +   | 5.25E-06 |
| ↳organelle membrane                                    | 2935      | 114  | 60.4     | 1.89       | +   | 1.29E-08 |
| ↳membrane                                              | 9711      | 269  | 199.83   | 1.35       | +   | 2.51E-08 |
| ↳mitochondrial envelope                                | 713       | 42   | 14.67    | 2.86       | +   | 2.59E-06 |
| ↳mitochondrial part                                    | 1008      | 58   | 20.74    | 2.8        | +   | 3.90E-09 |
| ↳mitochondrion                                         | 1568      | 81   | 32.27    | 2.51       | +   | 2.93E-11 |
| ↳organelle envelope                                    | 1161      | 57   | 23.89    | 2.39       | +   | 2.30E-06 |
| ↳envelope                                              | 1161      | 57   | 23.89    | 2.39       | +   | 2.30E-06 |
| ↳organelle inner membrane                              | 503       | 32   | 10.35    | 3.09       | +   | 4.33E-05 |
| ↳mitochondrial membrane part                           | 235       | 19   | 4.84     | 3.93       | +   | 9.77E-04 |
| ↳mitochondrial protein complex                         | 279       | 21   | 5.74     | 3.66       | +   | 7.98E-04 |
| ↳proton-transporting ATP synthase complex              | 24        | 6    | 0.49     | 12.15      | +   | 1.81E-02 |
| ↳proton-transporting two-sector ATPase complex         | 53        | 8    | 1.09     | 7.34       | +   | 2.55E-02 |
| melanosome                                             | 105       | 24   | 2.16     | 11.11      | +   | 1.79E-14 |
| ↳pigment granule                                       | 105       | 24   | 2.16     | 11.11      | +   | 1.79E-14 |
| ↳cytoplasmic vesicle                                   | 2289      | 112  | 47.1     | 2.38       | +   | 3.25E-15 |
| ↳intracellular vesicle                                 | 2292      | 112  | 47.16    | 2.37       | +   | 3.58E-15 |
| ↳vesicle                                               | 3783      | 195  | 77.85    | 2.5        | +   | 3.00E-35 |
| cytosolic large ribosomal subunit                      | 66        | 14   | 1.36     | 10.31      | +   | 2.80E-07 |
| ↳cytosolic part                                        | 259       | 33   | 5.33     | 6.19       | +   | 3.68E-13 |
| ↳cytosol                                               | 5077      | 172  | 104.47   | 1.65       | +   | 7.30E-10 |
| ↳large ribosomal subunit                               | 125       | 17   | 2.57     | 6.61       | +   | 2.65E-06 |
| ↳ribosomal subunit                                     | 199       | 26   | 4.1      | 6.35       | +   | 3.29E-10 |
| ↳ribonucleoprotein complex                             | 871       | 57   | 17.92    | 3.18       | +   | 3.55E-11 |
| ↳ribosome                                              | 252       | 27   | 5.19     | 5.21       | +   | 1.03E-08 |
| ↳intracellular non-membrane-bounded organelle          | 4197      | 134  | 86.37    | 1.55       | +   | 5.53E-05 |
| ↳non-membrane-bounded organelle                        | 4204      | 134  | 86.51    | 1.55       | +   | 6.12E-05 |
| ↳cytosolic ribosome                                    | 123       | 23   | 2.53     | 9.09       | +   | 5.71E-12 |
| COP9 signalosome                                       | 37        | 7    | 0.76     | 9.19       | +   | 2.06E-02 |
| ↳nuclear part                                          | 4488      | 146  | 92.35    | 1.58       | +   | 2.51E-06 |
| ↳nucleus                                               | 7295      | 203  | 150.12   | 1.35       | +   | 1.54E-04 |
| cytosolic small ribosomal subunit                      | 49        | 9    | 1.01     | 8.93       | +   | 1.59E-03 |
| myelin sheath                                          | 163       | 28   | 3.35     | 8.35       | +   | 4.75E-14 |
| ficolin-1-rich granule lumen                           | 124       | 21   | 2.55     | 8.23       | +   | 5.81E-10 |
| ↳ficolin-1-rich granule                                | 185       | 27   | 3.81     | 7.09       | +   | 8.54E-12 |
| ↳secretory granule                                     | 835       | 63   | 17.18    | 3.67       | +   | 1.64E-15 |
| ↳secretory vesicle                                     | 986       | 69   | 20.29    | 3.4        | +   | 1.48E-15 |
| ↳cytoplasmic vesicle part                              | 1475      | 70   | 30.35    | 2.31       | +   | 1.03E-07 |
| ↳intracellular organelle lumen                         | 5222      | 198  | 107.46   | 1.84       | +   | 4.52E-18 |
| ↳organelle lumen                                       | 5222      | 198  | 107.46   | 1.84       | +   | 4.52E-18 |
| ↳membrane-enclosed lumen                               | 5222      | 198  | 107.46   | 1.84       | +   | 4.52E-18 |
| polysome                                               | 76        | 12   | 1.56     | 7.67       | +   | 1.33E-04 |
| azurophil granule membrane                             | 58        | 9    | 1.19     | 7.54       | +   | 6.17E-03 |
| ↳lysosomal membrane                                    | 345       | 22   | 7.1      | 3.1        | +   | 6.16E-03 |

|                                                                |      |     |       |      |   |          |
|----------------------------------------------------------------|------|-----|-------|------|---|----------|
| ↳lysosome                                                      | 669  | 44  | 13.77 | 3.2  | + | 3.44E-08 |
| ↳lytic vacuole                                                 | 670  | 44  | 13.79 | 3.19 | + | 3.60E-08 |
| ↳vacuole                                                       | 771  | 47  | 15.87 | 2.96 | + | 8.56E-08 |
| ↳lytic vacuole membrane                                        | 346  | 22  | 7.12  | 3.09 | + | 6.45E-03 |
| ↳vacuolar membrane                                             | 402  | 23  | 8.27  | 2.78 | + | 2.10E-02 |
| ↳whole membrane                                                | 1635 | 66  | 33.64 | 1.96 | + | 1.96E-04 |
| ↳vacuolar part                                                 | 557  | 37  | 11.46 | 3.23 | + | 1.11E-06 |
| ↳bounding membrane of organelle                                | 2068 | 74  | 42.56 | 1.74 | + | 3.02E-03 |
| ↳azurophil granule                                             | 154  | 21  | 3.17  | 6.63 | + | 3.14E-08 |
| ↳primary lysosome                                              | 154  | 21  | 3.17  | 6.63 | + | 3.14E-08 |
| ↳secretory granule membrane                                    | 300  | 22  | 6.17  | 3.56 | + | 6.60E-04 |
| rough endoplasmic reticulum                                    | 92   | 12  | 1.89  | 6.34 | + | 9.85E-04 |
| azurophil granule lumen                                        | 90   | 11  | 1.85  | 5.94 | + | 5.27E-03 |
| ↳vacuolar lumen                                                | 170  | 17  | 3.5   | 4.86 | + | 2.14E-04 |
| ↳secretory granule lumen                                       | 320  | 30  | 6.58  | 4.56 | + | 1.78E-08 |
| ↳cytoplasmic vesicle lumen                                     | 336  | 30  | 6.91  | 4.34 | + | 5.71E-08 |
| ↳vesicle lumen                                                 | 337  | 30  | 6.93  | 4.33 | + | 6.12E-08 |
| mitochondrial respiratory chain                                | 95   | 11  | 1.95  | 5.63 | + | 8.72E-03 |
| ↳respiratory chain                                             | 105  | 11  | 2.16  | 5.09 | + | 2.19E-02 |
| oxidoreductase complex                                         | 113  | 13  | 2.33  | 5.59 | + | 1.36E-03 |
| ↳catalytic complex                                             | 1413 | 68  | 29.08 | 2.34 | + | 1.12E-07 |
| focal adhesion                                                 | 404  | 45  | 8.31  | 5.41 | + | 1.76E-16 |
| ↳cell-substrate adherens junction                              | 407  | 45  | 8.38  | 5.37 | + | 2.32E-16 |
| ↳adherens junction                                             | 538  | 50  | 11.07 | 4.52 | + | 2.42E-15 |
| ↳anchoring junction                                            | 554  | 52  | 11.4  | 4.56 | + | 3.13E-16 |
| ↳cell junction                                                 | 1276 | 65  | 26.26 | 2.48 | + | 3.02E-08 |
| ↳cell-substrate junction                                       | 411  | 45  | 8.46  | 5.32 | + | 3.35E-16 |
| respiratory chain complex                                      | 90   | 10  | 1.85  | 5.4  | + | 3.24E-02 |
| lysosomal lumen                                                | 94   | 10  | 1.93  | 5.17 | + | 4.66E-02 |
| endoplasmic reticulum-Golgi intermediate compartment           | 126  | 13  | 2.59  | 5.01 | + | 4.42E-03 |
| endoplasmic reticulum lumen                                    | 300  | 29  | 6.17  | 4.7  | + | 1.93E-08 |
| extracellular exosome                                          | 2095 | 154 | 43.11 | 3.57 | + | 1.76E-43 |
| ↳extracellular vesicle                                         | 2115 | 154 | 43.52 | 3.54 | + | 5.67E-43 |
| ↳extracellular organelle                                       | 2117 | 154 | 43.56 | 3.54 | + | 6.37E-43 |
| ↳extracellular region part                                     | 3491 | 179 | 71.84 | 2.49 | + | 5.46E-31 |
| ↳extracellular region                                          | 4302 | 190 | 88.53 | 2.15 | + | 5.18E-25 |
| ↳extracellular space                                           | 3304 | 173 | 67.99 | 2.54 | + | 1.05E-30 |
| cell-cell junction                                             | 452  | 26  | 9.3   | 2.8  | + | 5.32E-03 |
| mitochondrial matrix                                           | 466  | 26  | 9.59  | 2.71 | + | 9.06E-03 |
| endoplasmic reticulum membrane                                 | 1062 | 47  | 21.85 | 2.15 | + | 1.33E-03 |
| ↳nuclear outer membrane-endoplasmic reticulum membrane network | 1085 | 48  | 22.33 | 2.15 | + | 1.02E-03 |
| ↳endoplasmic reticulum subcompartment                          | 1067 | 47  | 21.96 | 2.14 | + | 1.51E-03 |
| ↳organelle subcompartment                                      | 1687 | 60  | 34.71 | 1.73 | + | 3.82E-02 |
| synapse                                                        | 1176 | 50  | 24.2  | 2.07 | + | 1.83E-03 |
| nucleoplasm                                                    | 3486 | 106 | 71.73 | 1.48 | + | 2.34E-02 |
| ↳nuclear lumen                                                 | 4090 | 130 | 84.16 | 1.54 | + | 1.29E-04 |
| Unclassified                                                   | 2312 | 6   | 47.58 | 0.13 | - | 0.00E+00 |

| GO cellular component complete                                 | reference | Fold |          |            |     |           |
|----------------------------------------------------------------|-----------|------|----------|------------|-----|-----------|
|                                                                | genes #   | #    | expected | Enrichment | +/- | P value   |
| ciliary tip                                                    | 46        | 39   | 18.94    | 2.06       | +   | 4.95E-02  |
| ↳ ciliary part                                                 | 445       | 284  | 183.25   | 1.55       | +   | 2.64E-09  |
| ↳ cilium                                                       | 595       | 377  | 245.02   | 1.54       | +   | 1.68E-12  |
| ↳ organelle                                                    | 13455     | 6486 | 5540.71  | 1.17       | +   | 6.61E-102 |
| ↳ plasma membrane bounded cell projection                      | 2078      | 1000 | 855.71   | 1.17       | +   | 2.93E-04  |
| ↳ cell projection                                              | 2145      | 1033 | 883.3    | 1.17       | +   | 1.58E-04  |
| ↳ cell part                                                    | 17007     | 7520 | 7003.41  | 1.07       | +   | 2.71E-46  |
| ↳ cell                                                         | 17034     | 7528 | 7014.52  | 1.07       | +   | 5.63E-46  |
| ↳ organelle part                                               | 9480      | 4702 | 3903.82  | 1.2        | +   | 3.30E-63  |
| ↳ plasma membrane bounded cell projection part                 | 1443      | 711  | 594.22   | 1.2        | +   | 1.06E-03  |
| ↳ cell projection part                                         | 1443      | 711  | 594.22   | 1.2        | +   | 1.06E-03  |
| ciliary transition zone                                        | 69        | 57   | 28.41    | 2.01       | +   | 2.08E-03  |
| centriole                                                      | 134       | 103  | 55.18    | 1.87       | +   | 7.23E-06  |
| ↳ microtubule organizing center part                           | 181       | 136  | 74.53    | 1.82       | +   | 1.25E-07  |
| ↳ microtubule organizing center                                | 732       | 474  | 301.43   | 1.57       | +   | 6.74E-18  |
| ↳ microtubule cytoskeleton                                     | 1191      | 729  | 490.45   | 1.49       | +   | 2.42E-22  |
| ↳ cytoskeleton                                                 | 2168      | 1104 | 892.77   | 1.24       | +   | 3.80E-10  |
| ↳ intracellular non-membrane-bounded organelle                 | 4197      | 2089 | 1728.31  | 1.21       | +   | 2.25E-18  |
| ↳ non-membrane-bounded organelle                               | 4204      | 2094 | 1731.19  | 1.21       | +   | 1.41E-18  |
| ↳ intracellular organelle                                      | 12625     | 6137 | 5198.92  | 1.18       | +   | 8.03E-95  |
| ↳ intracellular part                                           | 14422     | 6954 | 5938.91  | 1.17       | +   | 1.23E-129 |
| ↳ intracellular                                                | 14699     | 7024 | 6052.98  | 1.16       | +   | 8.61E-122 |
| ↳ cytoskeletal part                                            | 1673      | 880  | 688.93   | 1.28       | +   | 2.24E-10  |
| ↳ intracellular organelle part                                 | 9183      | 4588 | 3781.52  | 1.21       | +   | 9.64E-65  |
| ↳ cytoplasmic part                                             | 9646      | 4746 | 3972.18  | 1.19       | +   | 2.76E-59  |
| ↳ cytoplasm                                                    | 11495     | 5578 | 4733.59  | 1.18       | +   | 1.27E-72  |
| ciliary basal body                                             | 119       | 91   | 49       | 1.86       | +   | 6.73E-05  |
| axoneme                                                        | 114       | 85   | 46.94    | 1.81       | +   | 4.97E-04  |
| ↳ ciliary plasm                                                | 115       | 86   | 47.36    | 1.82       | +   | 3.79E-04  |
| ↳ plasma membrane bounded cell projection cytoplasm            | 194       | 135  | 79.89    | 1.69       | +   | 1.45E-05  |
| ↳ cytoplasmic region                                           | 492       | 263  | 202.6    | 1.3        | +   | 3.10E-02  |
| peroxisomal part                                               | 101       | 73   | 41.59    | 1.76       | +   | 8.89E-03  |
| ↳ peroxisome                                                   | 135       | 95   | 55.59    | 1.71       | +   | 1.25E-03  |
| ↳ microbody                                                    | 135       | 95   | 55.59    | 1.71       | +   | 1.25E-03  |
| ↳ intracellular membrane-bounded organelle                     | 10846     | 5374 | 4466.33  | 1.2        | +   | 8.02E-83  |
| ↳ membrane-bounded organelle                                   | 12364     | 5979 | 5091.44  | 1.17       | +   | 2.23E-83  |
| ↳ microbody part                                               | 101       | 73   | 41.59    | 1.76       | +   | 8.89E-03  |
| spindle pole                                                   | 152       | 104  | 62.59    | 1.66       | +   | 1.36E-03  |
| ↳ spindle                                                      | 335       | 217  | 137.95   | 1.57       | +   | 3.09E-07  |
| cullin-RING ubiquitin ligase complex                           | 158       | 107  | 65.06    | 1.64       | +   | 1.51E-03  |
| ↳ ubiquitin ligase complex                                     | 283       | 172  | 116.54   | 1.48       | +   | 1.09E-03  |
| ↳ transferase complex                                          | 813       | 470  | 334.79   | 1.4        | +   | 8.76E-10  |
| ↳ catalytic complex                                            | 1413      | 761  | 581.87   | 1.31       | +   | 1.40E-10  |
| ↳ protein-containing complex                                   | 5383      | 2491 | 2216.69  | 1.12       | +   | 1.96E-08  |
| kinetochore                                                    | 134       | 89   | 55.18    | 1.61       | +   | 2.29E-02  |
| ↳ chromosomal part                                             | 884       | 502  | 364.03   | 1.38       | +   | 2.01E-09  |
| ↳ chromosome                                                   | 1011      | 567  | 416.33   | 1.36       | +   | 5.11E-10  |
| ↳ chromosome, centromeric region                               | 192       | 122  | 79.06    | 1.54       | +   | 5.77E-03  |
| ↳ chromosomal region                                           | 331       | 203  | 136.3    | 1.49       | +   | 6.34E-05  |
| centrosome                                                     | 517       | 341  | 212.9    | 1.6        | +   | 2.24E-13  |
| mitochondrial matrix                                           | 466       | 306  | 191.9    | 1.59       | +   | 1.37E-11  |
| ↳ intracellular organelle lumen                                | 5222      | 2643 | 2150.4   | 1.23       | +   | 3.98E-30  |
| ↳ organelle lumen                                              | 5222      | 2643 | 2150.4   | 1.23       | +   | 3.98E-30  |
| ↳ membrane-enclosed lumen                                      | 5222      | 2643 | 2150.4   | 1.23       | +   | 3.98E-30  |
| ↳ mitochondrial part                                           | 1008      | 591  | 415.09   | 1.42       | +   | 5.89E-14  |
| ↳ mitochondrion                                                | 1568      | 896  | 645.7    | 1.39       | +   | 2.10E-19  |
| motile cilium                                                  | 180       | 115  | 74.12    | 1.55       | +   | 8.44E-03  |
| microtubule                                                    | 422       | 268  | 173.78   | 1.54       | +   | 1.78E-08  |
| mitochondrial inner membrane                                   | 443       | 260  | 182.43   | 1.43       | +   | 3.79E-05  |
| ↳ mitochondrial membrane                                       | 674       | 375  | 277.55   | 1.35       | +   | 1.26E-05  |
| ↳ organelle membrane                                           | 2935      | 1486 | 1208.62  | 1.23       | +   | 5.27E-14  |
| ↳ mitochondrial envelope                                       | 713       | 394  | 293.61   | 1.34       | +   | 1.10E-05  |
| ↳ organelle envelope                                           | 1161      | 625  | 478.09   | 1.31       | +   | 2.89E-08  |
| ↳ envelope                                                     | 1161      | 625  | 478.09   | 1.31       | +   | 2.89E-08  |
| ↳ organelle inner membrane                                     | 503       | 291  | 207.13   | 1.4        | +   | 2.10E-05  |
| transferase complex, transferring phosphorus-containing groups | 283       | 163  | 116.54   | 1.4        | +   | 3.46E-02  |

|                                                                |      |      |         |      |   |          |
|----------------------------------------------------------------|------|------|---------|------|---|----------|
| chromatin                                                      | 512  | 285  | 210.84  | 1.35 | + | 7.10E-04 |
| nuclear chromosome part                                        | 539  | 299  | 221.96  | 1.35 | + | 5.00E-04 |
| ↳nuclear part                                                  | 4488 | 2311 | 1848.14 | 1.25 | + | 2.77E-29 |
| ↳nucleus                                                       | 7295 | 3624 | 3004.05 | 1.21 | + | 2.04E-40 |
| ↳nuclear chromosome                                            | 577  | 320  | 237.61  | 1.35 | + | 2.01E-04 |
| ↳nuclear lumen                                                 | 4090 | 2116 | 1684.24 | 1.26 | + | 4.09E-27 |
| nuclear body                                                   | 747  | 407  | 307.61  | 1.32 | + | 2.88E-05 |
| ↳nucleoplasm part                                              | 1109 | 626  | 456.68  | 1.37 | + | 8.70E-12 |
| ↳nucleoplasm                                                   | 3486 | 1854 | 1435.52 | 1.29 | + | 1.36E-28 |
| Golgi subcompartment                                           | 844  | 427  | 347.56  | 1.23 | + | 2.00E-02 |
| ↳Golgi apparatus part                                          | 963  | 480  | 396.56  | 1.21 | + | 2.44E-02 |
| ↳Golgi apparatus                                               | 1543 | 775  | 635.4   | 1.22 | + | 1.89E-05 |
| ↳endomembrane system                                           | 4432 | 2036 | 1825.08 | 1.12 | + | 3.14E-05 |
| ↳organelle subcompartment                                      | 1687 | 848  | 694.7   | 1.22 | + | 3.18E-06 |
| cytosol                                                        | 5077 | 2540 | 2090.69 | 1.21 | + | 2.08E-25 |
| endoplasmic reticulum membrane                                 | 1062 | 521  | 437.33  | 1.19 | + | 4.97E-02 |
| ↳nuclear outer membrane-endoplasmic reticulum membrane network | 1085 | 534  | 446.8   | 1.2  | + | 2.92E-02 |
| ↳endoplasmic reticulum subcompartment                          | 1067 | 524  | 439.39  | 1.19 | + | 4.28E-02 |
| bounding membrane of organelle                                 | 2068 | 1013 | 851.59  | 1.19 | + | 1.07E-05 |
| integral component of plasma membrane                          | 1618 | 516  | 666.29  | 0.77 | - | 2.65E-07 |
| ↳intrinsic component of membrane                               | 5647 | 2159 | 2325.41 | 0.93 | - | 3.59E-02 |
| ↳intrinsic component of plasma membrane                        | 1698 | 553  | 699.23  | 0.79 | - | 1.98E-06 |
| ↳plasma membrane part                                          | 2880 | 1030 | 1185.97 | 0.87 | - | 5.23E-04 |
| ↳plasma membrane                                               | 5575 | 1869 | 2295.76 | 0.81 | - | 2.04E-23 |
| ↳cell periphery                                                | 5695 | 1924 | 2345.18 | 0.82 | - | 2.11E-22 |
| extracellular matrix                                           | 433  | 127  | 178.31  | 0.71 | - | 3.84E-02 |
| ↳extracellular region part                                     | 3491 | 1228 | 1437.58 | 0.85 | - | 5.13E-07 |
| ↳extracellular region                                          | 4302 | 1472 | 1771.54 | 0.83 | - | 2.69E-13 |
| Unclassified                                                   | 2312 | 636  | 952.07  | 0.67 | - | 0.00E+00 |
| external side of plasma membrane                               | 385  | 89   | 158.54  | 0.56 | - | 1.31E-06 |
| ↳side of membrane                                              | 584  | 175  | 240.49  | 0.73 | - | 6.06E-03 |
| ↳cell surface                                                  | 880  | 261  | 362.38  | 0.72 | - | 9.58E-06 |
| keratin filament                                               | 102  | 9    | 42      | 0.21 | - | 1.08E-06 |
| ↳intermediate filament                                         | 214  | 35   | 88.12   | 0.4  | - | 1.22E-07 |
| ↳intermediate filament cytoskeleton                            | 251  | 48   | 103.36  | 0.46 | - | 1.10E-06 |
| immunoglobulin complex, circulating                            | 95   | 3    | 39.12   | 0.08 | - | 1.45E-10 |
| ↳extracellular space                                           | 3304 | 1152 | 1360.57 | 0.85 | - | 2.43E-07 |
| ↳immunoglobulin complex                                        | 100  | 4    | 41.18   | 0.1  | - | 2.25E-10 |

## VSV

| GO cellular component complete            | reference | Fold |          |            |     |          |
|-------------------------------------------|-----------|------|----------|------------|-----|----------|
|                                           | genes #   | #    | expected | Enrichment | +/- | P value  |
| centrosome                                | 517       | 32   | 12.01    | 2.66       | +   | 1.19E-03 |
| ↳microtubule organizing center            | 732       | 36   | 17.01    | 2.12       | +   | 3.91E-02 |
| ↳organelle                                | 13455     | 371  | 312.68   | 1.19       | +   | 1.42E-05 |
| ↳intracellular organelle                  | 12625     | 368  | 293.4    | 1.25       | +   | 1.23E-09 |
| ↳intracellular part                       | 14422     | 406  | 335.16   | 1.21       | +   | 3.28E-10 |
| ↳intracellular                            | 14699     | 408  | 341.59   | 1.19       | +   | 4.82E-09 |
| ↳intracellular organelle part             | 9183      | 278  | 213.41   | 1.3        | +   | 4.32E-06 |
| ↳organelle part                           | 9480      | 281  | 220.31   | 1.28       | +   | 3.47E-05 |
| nuclear body                              | 747       | 45   | 17.36    | 2.59       | +   | 1.45E-05 |
| ↳nucleoplasm part                         | 1109      | 56   | 25.77    | 2.17       | +   | 8.97E-05 |
| ↳nucleoplasm                              | 3486      | 168  | 81.01    | 2.07       | +   | 1.40E-18 |
| ↳nuclear lumen                            | 4090      | 180  | 95.05    | 1.89       | +   | 4.24E-16 |
| ↳intracellular organelle lumen            | 5222      | 197  | 121.36   | 1.62       | +   | 5.82E-11 |
| ↳organelle lumen                          | 5222      | 197  | 121.36   | 1.62       | +   | 5.82E-11 |
| ↳membrane-enclosed lumen                  | 5222      | 197  | 121.36   | 1.62       | +   | 5.82E-11 |
| ↳nuclear part                             | 4488      | 188  | 104.3    | 1.8        | +   | 8.52E-15 |
| ↳nucleus                                  | 7295      | 269  | 169.53   | 1.59       | +   | 4.56E-17 |
| ↳intracellular membrane-bounded organelle | 10846     | 335  | 252.05   | 1.33       | +   | 2.84E-11 |
| ↳membrane-bounded organelle               | 12364     | 348  | 287.33   | 1.21       | +   | 1.19E-05 |
| cytosol                                   | 5077      | 170  | 117.99   | 1.44       | +   | 1.18E-04 |
| Unclassified                              | 2312      | 41   | 53.73    | 0.76       | -   | 0.00E+00 |
| extracellular space                       | 3304      | 42   | 76.78    | 0.55       | -   | 3.39E-03 |
| ↳extracellular region part                | 3491      | 46   | 81.13    | 0.57       | -   | 4.88E-03 |
| ↳extracellular region                     | 4302      | 54   | 99.98    | 0.54       | -   | 3.39E-05 |
| integral component of plasma membrane     | 1618      | 14   | 37.6     | 0.37       | -   | 7.18E-03 |
| ↳integral component of membrane           | 5488      | 81   | 127.54   | 0.64       | -   | 4.94E-04 |
| ↳intrinsic component of membrane          | 5647      | 81   | 131.23   | 0.62       | -   | 7.22E-05 |
| ↳membrane part                            | 6959      | 114  | 161.72   | 0.7        | -   | 2.12E-03 |
| ↳membrane                                 | 9711      | 169  | 225.68   | 0.75       | -   | 1.86E-04 |
| ↳intrinsic component of plasma membrane   | 1698      | 14   | 39.46    | 0.35       | -   | 1.94E-03 |
| ↳plasma membrane part                     | 2880      | 36   | 66.93    | 0.54       | -   | 1.15E-02 |
| ↳plasma membrane                          | 5575      | 82   | 129.56   | 0.63       | -   | 3.19E-04 |
| ↳cell periphery                           | 5695      | 83   | 132.35   | 0.63       | -   | 1.37E-04 |

SeV

|                                | reference |    |          | Fold       |     |          |
|--------------------------------|-----------|----|----------|------------|-----|----------|
| GO cellular component complete | genes #   | #  | expected | Enrichment | +/- | P value  |
| synaptic vesicle               | 184       | 9  | 1.57     | 5.75       | +   | 4.71E-02 |
| Exocytic vesicle               | 202       | 10 | 1.72     | 5.82       | +   | 1.55E-02 |
| Unclassified                   | 2312      | 10 | 19.67    | 0.51       | -   | 0.00E+00 |

## MVA

| GO cellular component complete                                               | reference | Fold |          |            |     |          |
|------------------------------------------------------------------------------|-----------|------|----------|------------|-----|----------|
|                                                                              | genes #   | #    | expected | Enrichment | +/- | P value  |
| mitochondrial proton-transporting ATP synthase complex, coupling factor F(o) | 11        | 4    | 0.07     | 55.05      | +   | 1.48E-03 |
| ↳proton-transporting ATP synthase complex, coupling factor F(o)              | 13        | 4    | 0.09     | 46.58      | +   | 2.87E-03 |
| ↳proton-transporting two-sector ATPase complex, proton-transporting domain   | 23        | 4    | 0.15     | 26.33      | +   | 2.67E-02 |
| ↳proton-transporting two-sector ATPase complex                               | 53        | 6    | 0.35     | 17.14      | +   | 2.43E-03 |
| ↳membrane protein complex                                                    | 1215      | 29   | 8.03     | 3.61       | +   | 2.17E-06 |
| ↳protein-containing complex                                                  | 5383      | 85   | 35.56    | 2.39       | +   | 1.48E-15 |
| ↳proton-transporting ATP synthase complex                                    | 24        | 6    | 0.16     | 37.85      | +   | 2.45E-05 |
| ↳intracellular part                                                          | 14422     | 130  | 95.27    | 1.36       | +   | 9.62E-10 |
| ↳intracellular                                                               | 14699     | 130  | 97.1     | 1.34       | +   | 7.85E-09 |
| ↳cell part                                                                   | 17007     | 135  | 112.35   | 1.2        | +   | 1.06E-05 |
| ↳cell                                                                        | 17034     | 136  | 112.52   | 1.21       | +   | 1.55E-06 |
| ↳mitochondrial proton-transporting ATP synthase complex                      | 23        | 6    | 0.15     | 39.49      | +   | 1.91E-05 |
| ↳inner mitochondrial membrane protein complex                                | 147       | 21   | 0.97     | 21.63      | +   | 1.38E-18 |
| ↳mitochondrial inner membrane                                                | 443       | 24   | 2.93     | 8.2        | +   | 4.13E-12 |
| ↳mitochondrial membrane                                                      | 674       | 27   | 4.45     | 6.06       | +   | 8.48E-11 |
| ↳organelle membrane                                                          | 2935      | 41   | 19.39    | 2.11       | +   | 2.33E-03 |
| ↳organelle part                                                              | 9480      | 110  | 62.62    | 1.76       | +   | 2.86E-13 |
| ↳organelle                                                                   | 13455     | 129  | 88.88    | 1.45       | +   | 2.86E-12 |
| ↳membrane-bounded organelle                                                  | 12364     | 123  | 81.67    | 1.51       | +   | 1.80E-11 |
| ↳mitochondrial envelope                                                      | 713       | 27   | 4.71     | 5.73       | +   | 3.15E-10 |
| ↳mitochondrial part                                                          | 1008      | 29   | 6.66     | 4.36       | +   | 2.88E-08 |
| ↳mitochondrion                                                               | 1568      | 32   | 10.36    | 3.09       | +   | 1.17E-05 |
| ↳cytoplasmic part                                                            | 9646      | 111  | 63.72    | 1.74       | +   | 2.80E-13 |
| ↳cytoplasm                                                                   | 11495     | 122  | 75.93    | 1.61       | +   | 6.25E-14 |
| ↳intracellular membrane-bounded organelle                                    | 10846     | 108  | 71.65    | 1.51       | +   | 2.57E-07 |
| ↳intracellular organelle                                                     | 12625     | 124  | 83.4     | 1.49       | +   | 2.78E-11 |
| ↳intracellular organelle part                                                | 9183      | 108  | 60.66    | 1.78       | +   | 3.90E-13 |
| ↳organelle envelope                                                          | 1161      | 29   | 7.67     | 3.78       | +   | 7.73E-07 |
| ↳envelope                                                                    | 1161      | 29   | 7.67     | 3.78       | +   | 7.73E-07 |
| ↳organelle inner membrane                                                    | 503       | 24   | 3.32     | 7.22       | +   | 6.32E-11 |
| ↳mitochondrial membrane part                                                 | 235       | 22   | 1.55     | 14.17      | +   | 9.86E-16 |
| ↳mitochondrial protein complex                                               | 279       | 21   | 1.84     | 11.39      | +   | 4.73E-13 |
| complex of collagen trimers                                                  | 20        | 5    | 0.13     | 37.85      | +   | 3.96E-04 |
| ↳supramolecular complex                                                      | 966       | 20   | 6.38     | 3.13       | +   | 8.81E-03 |
| ↳extracellular region part                                                   | 3491      | 52   | 23.06    | 2.25       | +   | 4.46E-06 |
| ↳extracellular region                                                        | 4302      | 55   | 28.42    | 1.94       | +   | 2.84E-04 |
| ↳extracellular matrix component                                              | 50        | 5    | 0.33     | 15.14      | +   | 3.30E-02 |
| mitochondrial respiratory chain complex IV                                   | 16        | 4    | 0.11     | 37.85      | +   | 6.48E-03 |
| ↳mitochondrial respiratory chain                                             | 95        | 14   | 0.63     | 22.31      | +   | 7.14E-12 |
| ↳respiratory chain                                                           | 105       | 14   | 0.69     | 20.18      | +   | 2.74E-11 |
| ↳respiratory chain complex IV                                                | 21        | 4    | 0.14     | 28.83      | +   | 1.87E-02 |
| ↳cytochrome complex                                                          | 36        | 6    | 0.24     | 25.23      | +   | 2.62E-04 |
| ↳respiratory chain complex                                                   | 90        | 12   | 0.59     | 20.18      | +   | 2.14E-09 |
| cytosolic small ribosomal subunit                                            | 49        | 10   | 0.32     | 30.89      | +   | 2.68E-09 |
| ↳small ribosomal subunit                                                     | 76        | 10   | 0.5      | 19.92      | +   | 1.86E-07 |
| ↳ribosomal subunit                                                           | 199       | 13   | 1.31     | 9.89       | +   | 1.47E-06 |
| ↳ribonucleoprotein complex                                                   | 871       | 19   | 5.75     | 3.3        | +   | 7.39E-03 |
| ↳ribosome                                                                    | 252       | 13   | 1.66     | 7.81       | +   | 2.35E-05 |
| ↳intracellular non-membrane-bounded organelle                                | 4197      | 51   | 27.72    | 1.84       | +   | 4.96E-03 |
| ↳non-membrane-bounded organelle                                              | 4204      | 51   | 27.77    | 1.84       | +   | 5.22E-03 |
| ↳cytosolic ribosome                                                          | 123       | 13   | 0.81     | 16         | +   | 4.31E-09 |
| ↳cytosolic part                                                              | 259       | 13   | 1.71     | 7.6        | +   | 3.23E-05 |
| ↳cytosol                                                                     | 5077      | 64   | 33.54    | 1.91       | +   | 2.07E-05 |
| mitochondrial respiratory chain complex I                                    | 52        | 6    | 0.34     | 17.47      | +   | 2.18E-03 |
| ↳respiratory chain complex I                                                 | 52        | 6    | 0.34     | 17.47      | +   | 2.18E-03 |
| ↳NADH dehydrogenase complex                                                  | 52        | 6    | 0.34     | 17.47      | +   | 2.18E-03 |
| ↳oxidoreductase complex                                                      | 113       | 9    | 0.75     | 12.06      | +   | 1.15E-04 |
| polysome                                                                     | 76        | 6    | 0.5      | 11.95      | +   | 1.87E-02 |
| collagen trimer                                                              | 92        | 7    | 0.61     | 11.52      | +   | 4.45E-03 |
| focal adhesion                                                               | 404       | 15   | 2.67     | 5.62       | +   | 1.30E-04 |
| ↳cell-substrate adherens junction                                            | 407       | 15   | 2.69     | 5.58       | +   | 1.43E-04 |
| ↳adherens junction                                                           | 538       | 16   | 3.55     | 4.5        | +   | 9.06E-04 |
| ↳anchoring junction                                                          | 554       | 16   | 3.66     | 4.37       | +   | 1.33E-03 |
| ↳cell-substrate junction                                                     | 411       | 15   | 2.71     | 5.52       | +   | 1.62E-04 |
| actin cytoskeleton                                                           | 490       | 13   | 3.24     | 4.02       | +   | 3.54E-02 |
| supramolecular polymer                                                       | 965       | 20   | 6.37     | 3.14       | +   | 8.67E-03 |

|                               |      |    |       |      |   |          |
|-------------------------------|------|----|-------|------|---|----------|
| extracellular exosome         | 2095 | 41 | 13.84 | 2.96 | + | 1.66E-07 |
| ↳ extracellular vesicle       | 2115 | 42 | 13.97 | 3.01 | + | 5.72E-08 |
| ↳ vesicle                     | 3783 | 46 | 24.99 | 1.84 | + | 1.92E-02 |
| ↳ extracellular organelle     | 2117 | 42 | 13.98 | 3    | + | 5.89E-08 |
| ↳ extracellular space         | 3304 | 52 | 21.83 | 2.38 | + | 6.23E-07 |
| intracellular organelle lumen | 5222 | 61 | 34.5  | 1.77 | + | 1.04E-03 |
| ↳ organelle lumen             | 5222 | 61 | 34.5  | 1.77 | + | 1.04E-03 |
| ↳ membrane-enclosed lumen     | 5222 | 61 | 34.5  | 1.77 | + | 1.04E-03 |
| Unclassified                  | 2312 | 1  | 15.27 | 0.07 | - | 0.00E+00 |
